# Supplementary material for: Episodic Magma Hammers in the Recent Cataclysmic Eruption of Hunga Tonga-Hunga Ha'apai
Source: Research Square preprint supplement (doi:10.21203/rs.3.rs-1639007/v1), 2022-06-01
Supplement: Supplementary file 1 [file 72ef5a1aac3ffb7675da9c9b.xlsx]

## Sheet: vol frax
P (bar)	T (C)	Melt	Cpx1	Cpx2	Pl	Mt	fluid
1	1063.81	0.000750797	0.000109144	3.90656e-05	0.000314637	1.33621e-05	0.998773
20	1063.91	0.0169031	0.00180515	0.000819002	0.00547023	0.000260638	0.974742
40	1064.02	0.0357333	0.003119	0.00173458	0.00985997	0.000506223	0.949047
60	1064.14	0.0559452	0.00403465	0.00270403	0.0133036	0.000715722	0.923297
80	1064.25	0.0772539	0.00458991	0.0037429	0.0159056	0.000890673	0.897617
100	1064.36	0.0995195	0.00480432	0.00485529	0.0177186	0.00102958	0.872073
120	1064.47	0.122647	0.00604528	0.00469079	0.0187823	0.00113164	0.846703
140	1064.58	0.146564	0.00731748	0.00425925	0.0191316	0.00119687	0.821531
160	1064.7	0.171228	0.00867291	0.00351534	0.0187885	0.00122392	0.796572
180	1064.81	0.196584	0.0101168	0.00246669	0.0177839	0.00121409	0.771835
200	1064.92	0.2226	0.0116509	0.00111784	0.0161381	0.00116716	0.747326
300	1065.48	0.352032	0.0119305	0	0.00490184	0	0.631135
400	1066.04	0.459242	0.0089393	0	0	0	0.531819
500	1066.6	0.547316	0.00434665	0	0	0	0.448337
600	1067.16	0.622577	0	0	0	0	0.377423
700	1067.72	0.680955	0	0	0	0	0.319045
800	1068.28	0.73045	0	0	0	0	0.26955
900	1068.84	0.772514	0	0	0	0	0.227486
1000	1069.4	0.80836	0	0	0	0	0.19164
1100	1069.96	0.838986	0	0	0	0	0.161014
1200	1070.52	0.865202	0	0	0	0	0.134798
1300	1071.08	0.887662	0	0	0	0	0.112338
1400	1071.64	0.906886	0	0	0	0	0.0931137
1500	1072.2	0.923283	0	0	0	0	0.0767174
1600	1072.76	0.937175	0	0	0	0	0.0628251
1700	1073.32	0.948825	0	0	0	0	0.0511755
1800	1073.88	0.95847	0	0	0	0	0.0415305
1900	1074.44	0.966345	0	0	0	0	0.0336548
2000	1075	0.972703	0	0	0	0	0.0272967

## Sheet: mass (g)
P (bar)	T (C)	Melt	Cpx1	Cpx2	Pl	Mt	fluid	System
1	1063.81	54.7095	10.7521	3.78051	24.1753	1.86056	4.75963	100.038
20	1063.91	60.3617	8.71518	3.88879	20.7206	1.78156	4.57671	100.044
40	1064.02	63.5713	7.50667	4.10818	18.6764	1.72608	4.45883	100.047
60	1064.14	66.4363	6.48255	4.27751	16.8658	1.62982	4.35602	100.048
80	1064.25	69.0419	5.55043	4.45822	15.2099	1.52685	4.26033	100.048
100	1064.36	71.4916	4.67012	4.65063	13.6469	1.41895	4.16853	100.047
120	1064.47	73.8377	4.85458	3.8214	12.1455	1.30713	4.079	100.045
140	1064.58	76.1083	5.07025	2.99294	10.6889	1.19245	3.99081	100.044
160	1064.7	78.3232	5.29506	2.17587	9.26093	1.07403	3.90294	100.032
180	1064.81	80.5034	5.53118	1.36683	7.85902	0.953684	3.81579	100.03
200	1064.92	82.6539	5.77707	0.561605	6.47521	0.831131	3.72866	100.028
300	1065.48	91.1696	4.13155	0	1.37987	0	3.31963	100.001
400	1066.04	94.5364	2.47104	0	0	0	2.99389	100.001
500	1066.6	96.2542	1.03013	0	0	0	2.717	100.001
600	1067.16	97.5394	0	0	0	0	2.46198	100.001
700	1067.72	97.7623	0	0	0	0	2.23898	100.001
800	1068.28	97.9715	0	0	0	0	2.02966	100.001
900	1068.84	98.1686	0	0	0	0	1.83243	100.001
1000	1069.4	98.3547	0	0	0	0	1.64623	100.001
1100	1069.96	98.5304	0	0	0	0	1.47042	100.001
1200	1070.52	98.696	0	0	0	0	1.30468	100.001
1300	1071.08	98.8516	0	0	0	0	1.149	100.001
1400	1071.64	98.9968	0	0	0	0	1.00369	100.001
1500	1072.2	99.1311	0	0	0	0	0.869323	100
1600	1072.76	99.2577	0	0	0	0	0.746689	100.004
1700	1073.32	99.3637	0	0	0	0	0.636567	100
1800	1073.88	99.4606	0	0	0	0	0.539629	100
1900	1074.44	99.5443	0	0	0	0	0.455941	100
2000	1075	99.6199	0	0	0	0	0.384874	100.005

## Sheet: density (gcc)
P (bar)	T (C)	Melt	Cpx1	Cpx2	Pl	Mt	fluid
1	1063.81	2.50937	3.39249	3.33257	2.64597	4.79505	0.000164108
20	1063.91	2.49876	3.37824	3.32245	2.65048	4.78289	0.00328543
40	1064.02	2.49195	3.37118	3.31745	2.6532	4.77606	0.00658088
60	1064.14	2.48749	3.36557	3.31359	2.65556	4.76994	0.00988251
80	1064.25	2.48383	3.36087	3.31042	2.6577	4.76439	0.0131911
100	1064.36	2.4807	3.35678	3.30768	2.65969	4.7592	0.0165066
120	1064.47	2.47794	3.30526	3.35311	2.66158	4.75424	0.0198287
140	1064.58	2.47546	3.30308	3.34977	2.66337	4.74945	0.0231573
160	1064.7	2.47324	3.30108	3.34669	2.6651	4.74478	0.0264922
180	1064.81	2.47121	3.29925	3.34383	2.66676	4.7402	0.0298334
200	1064.92	2.46934	3.29754	3.34114	2.66837	4.73569	0.0331807
300	1065.48	2.46185	3.29191	0	2.67591	0	0.049999
400	1066.04	2.4468	3.28562	0	0	0	0.0669136
500	1066.6	2.43431	3.28045	0	0	0	0.0838842
600	1067.16	2.42286	0	0	0	0	0.100878
700	1067.72	2.41071	0	0	0	0	0.117839
800	1068.28	2.39999	0	0	0	0	0.134736
900	1068.84	2.3905	0	0	0	0	0.151529
1000	1069.4	2.3821	0	0	0	0	0.16818
1100	1069.96	2.37468	0	0	0	0	0.184657
1200	1070.52	2.36819	0	0	0	0	0.200934
1300	1071.08	2.36256	0	0	0	0	0.216992
1400	1071.64	2.35778	0	0	0	0	0.232822
1500	1072.2	2.35384	0	0	0	0	0.248421
1600	1072.76	2.35074	0	0	0	0	0.263796
1700	1073.32	2.3485	0	0	0	0	0.278953
1800	1073.88	2.34712	0	0	0	0	0.293895
1900	1074.44	2.34657	0	0	0	0	0.308612
2000	1075	2.34678	0	0	0	0	0.323085

## Sheet: P1
	system	liquid	solids(+water)	clinopyroxene	clinopyroxene	feldspar	spinel	fluid
mass (g)	100.038	54.7095	45.3281	10.7521	3.78051	24.1753	1.86056	4.75963
ρ (g/cm3)	0.00344498	2.50937	0.00156213	3.39249	3.33257	2.64597	4.79505	0.000164108
G (kJ)	-1653.04	-875.478	-777.563	-154.831	-56.7721	-413.17	-14.17	-138.621
H (kJ)	-1259.91	-693.068	-566.84	-122.336	-45.5097	-337.053	-9.12514	-52.8169
S (J/K)	294.05	136.436	157.614	24.3053	8.42384	56.933	3.77337	64.1783
Cp (J/K)	133.465	73.5778	59.8877	12.4934	4.33273	29.4778	1.70221	11.8815
V (cm3)	29038.6	21.8021	29016.8	3.1694	1.13441	9.13664	0.388017	29003
α (1/K)	0.000747386	4.24981e-05	0.000747916	4.14241e-05	4.19931e-05	2.40166e-05	4.69005e-05	0.000748258
β (1/bar)	0.998821	7.43198e-06	0.999572	8.40891e-07	8.59885e-07	1.48651e-06	4.84035e-07	1.00005
SiO2	56.6243	67.1712	43.8946	50.1488	49.4241	52.1896
TiO2	0.606797	0.862632	0.298013	0.0817856	0.285593		6.19647
Al2O3	13.9492	11.1293	17.3528	2.58441	3.31377	30.5712	3.60982
Fe2O3	2.20166	2.07917	2.34949	2.43414	3.4294		54.2177
Cr2O3	0
FeO	7.19274	6.36233	8.19502	21.5097	12.6417		33.2871
MnO	0.170779	0.312168	0.000126787
MgO	3.33782	1.77445	5.22474	17.0013	12.9381		2.68894
NiO	0
CoO	0
CaO	8.41827	7.1825	9.90979	6.17159	17.7789	13.0438
Na2O	2.10982	2.01263	2.22713	0.068306	0.188419	4.11304
K2O	0.497073	0.872221	0.0442816			0.082335
P2O5	0.0876453	0.160208	6.50683e-05
H2O	4.70385	0.0811725	10.2833					97.899
CO2	0.099996	5.88706e-07	0.220687					2.101
MVPtot	5
R	0.0208158
T (C)	1063.81	1063.8
P (bar)	1

## Sheet: P20
	system	liquid	solids(+water)	clinopyroxene	clinopyroxene	feldspar	spinel	fluid
mass (g)	100.044	60.3617	39.6828	8.71518	3.88879	20.7206	1.78156	4.57671
ρ (g/cm3)	0.0700038	2.49876	0.0282445	3.37824	3.32245	2.65048	4.78289	0.00328543
G (kJ)	-1644.68	-966.529	-678.152	-126.634	-58.7895	-354.142	-13.656	-124.93
H (kJ)	-1258.33	-762.362	-495.973	-100.215	-47.1817	-288.971	-8.81628	-50.7883
S (J/K)	288.855	152.647	136.208	19.7525	8.67868	48.7256	3.61848	55.4329
Cp (J/K)	134.886	81.8731	53.0126	10.1796	4.47262	25.2571	1.63384	11.4694
V (cm3)	1429.13	24.1567	1404.97	2.5798	1.17046	7.81767	0.372485	1393.03
α (1/K)	0.000735615	5.35895e-05	0.000747342	4.12855e-05	4.19127e-05	2.37336e-05	4.75003e-05	0.00075349
β (1/bar)	0.048783	8.44764e-06	0.0496216	8.36238e-07	8.56993e-07	1.47194e-06	4.91763e-07	0.050047
SiO2	56.6243	65.6179	42.9441	50.417	49.5893	51.6208
TiO2	0.606797	0.802183	0.309595	0.0830099	0.2857		5.8525
Al2O3	13.9492	11.7611	17.2777	2.6665	3.43547	30.957	3.93882
Fe2O3	2.20166	2.15042	2.27959	2.35323	3.33215		54.6304
Cr2O3	0
FeO	7.19274	6.62684	8.05354	20.4983	11.8623		32.638
MnO	0.170779	0.282937	0.000174291
MgO	3.33782	2.01348	5.35228	17.7743	13.4011		2.9403
NiO	0
CoO	0
CaO	8.41827	7.27418	10.1585	6.14044	17.9088	13.4948
Na2O	2.10982	2.14986	2.04892	0.0672552	0.185221	3.8568
K2O	0.497073	0.799272	0.0373953			0.0706458
P2O5	0.0876453	0.145206	8.94479e-05
H2O	4.70385	0.37661	11.286					97.8152
CO2	0.099996	1.23702e-05	0.252082					2.18481
MVPtot	5
R	0.0208158
T (C)	1063.91	1064.36
P (bar)	20

## Sheet: P40
	system	liquid	solids(+water)	clinopyroxene	clinopyroxene	feldspar	spinel	fluid
mass (g)	100.047	63.5713	36.4762	7.50667	4.10818	18.6764	1.72608	4.45883
ρ (g/cm3)	0.140138	2.49195	0.0529862	3.37118	3.31745	2.6532	4.77606	0.00658088
G (kJ)	-1642.65	-1018.54	-624.115	-109.559	-62.3116	-319.177	-13.2796	-119.788
H (kJ)	-1257.51	-802.083	-455.431	-86.7838	-50.0459	-260.516	-8.58862	-49.4963
S (J/K)	288.026	161.877	126.149	17.0321	9.17291	43.8691	3.50811	52.5672
Cp (J/K)	135.71	86.6228	49.0873	8.791	4.73296	22.7594	1.5851	11.2189
V (cm3)	713.919	25.5107	688.409	2.22672	1.23835	7.03922	0.361403	677.543
α (1/K)	0.000723395	5.96319e-05	0.000747993	4.1206e-05	4.18638e-05	2.35627e-05	4.77745e-05	0.000759506
β (1/bar)	0.02377	9.01609e-06	0.0246505	8.33845e-07	8.5557e-07	1.46336e-06	4.9559e-07	0.0250458
SiO2	56.6243	64.8292	42.3248	50.5528	49.6659	51.2874
TiO2	0.606797	0.771656	0.319479	0.0839234	0.287548		5.68669
Al2O3	13.9492	12.1233	17.1315	2.7132	3.50716	31.1829	4.12891
Fe2O3	2.20166	2.17361	2.25054	2.30862	3.28067		54.8029
Cr2O3	0
FeO	7.19274	6.72226	8.01269	19.9915	11.4599		32.3004
MnO	0.170779	0.268652	0.00020361
MgO	3.33782	2.1402	5.42504	18.176	13.6266		3.08106
NiO	0
CoO	0
CaO	8.41827	7.31686	10.3378	6.10759	17.9889	13.759
Na2O	2.10982	2.21049	1.93438	0.0663906	0.183279	3.70606
K2O	0.497073	0.762932	0.0337291			0.0647175
P2O5	0.0876453	0.137875	0.000104495
H2O	4.70385	0.543003	11.9555					97.7576
CO2	0.099996	2.52698e-05	0.274227					2.24238
MVPtot	5
R	0.0208158
T (C)	1064.02
P (bar)	40

## Sheet: P60
	system	liquid	solids(+water)	clinopyroxene	clinopyroxene	feldspar	spinel	fluid
mass (g)	100.048	66.4363	33.6117	6.48255	4.27751	16.8658	1.62982	4.35602
ρ (g/cm3)	0.209569	2.48749	0.0745781	3.36557	3.31359	2.65556	4.76994	0.00988251
G (kJ)	-1641.54	-1064.8	-576.74	-94.9502	-65.0488	-288.224	-12.5821	-115.935
H (kJ)	-1256.68	-837.341	-419.337	-75.2608	-52.2694	-235.291	-8.14917	-48.3666
S (J/K)	287.79	170.087	117.703	14.7234	9.55617	39.5827	3.31489	50.5263
Cp (J/K)	136.468	90.8725	45.5952	7.60764	4.93466	20.549	1.4985	11.0054
V (cm3)	477.399	26.7082	450.691	1.92614	1.2909	6.35111	0.341685	440.781
α (1/K)	0.00071077	6.44398e-05	0.000749072	4.11456e-05	4.18277e-05	2.34161e-05	4.79971e-05	0.000765236
β (1/bar)	0.0154299	9.45528e-06	0.0163438	8.31922e-07	8.54426e-07	1.45582e-06	4.98665e-07	0.0167112
SiO2	56.6243	64.1445	41.76	50.6551	49.718	50.9962
TiO2	0.606797	0.750228	0.323294	0.0849081	0.28935		5.55377
Al2O3	13.9492	12.4266	16.9588	2.75649	3.57137	31.38	4.29902
Fe2O3	2.20166	2.19627	2.2123	2.27793	3.24497		54.9254
Cr2O3	0
FeO	7.19274	6.81845	7.93256	19.5826	11.1458		32.0185
MnO	0.170779	0.257066	0.000223491
MgO	3.33782	2.2526	5.48285	18.4936	13.801		3.20327
NiO	0
CoO	0
CaO	8.41827	7.36461	10.5009	6.08363	18.048	13.9896
Na2O	2.10982	2.25042	1.83191	0.0656467	0.181445	3.57406
K2O	0.497073	0.73296	0.0308215			0.0601277
P2O5	0.0876453	0.131929	0.000114698
H2O	4.70385	0.674323	12.6686					97.7049
CO2	0.099996	3.86101e-05	0.29757					2.29508
MVPtot	5
R	0.0208158
T (C)	1064.14
P (bar)	60

## Sheet: P80
	system	liquid	solids(+water)	clinopyroxene	clinopyroxene	feldspar	spinel	fluid
mass (g)	100.048	69.0419	31.0057	5.55043	4.45822	15.2099	1.52685	4.26033
ρ (g/cm3)	0.278059	2.48383	0.0933877	3.36087	3.31042	2.6577	4.76439	0.0131911
G (kJ)	-1640.74	-1106.88	-533.855	-81.5409	-67.9432	-259.919	-11.8246	-112.627
H (kJ)	-1255.9	-869.418	-386.482	-64.6667	-54.6169	-212.215	-7.66855	-47.3154
S (J/K)	287.75	177.556	110.193	12.6171	9.96434	35.6693	3.10756	48.8351
Cp (J/K)	137.166	94.7499	42.4157	6.52528	5.14881	18.5283	1.40537	10.8079
V (cm3)	359.807	27.7965	332.011	1.65148	1.34672	5.72296	0.320471	322.969
α (1/K)	0.000698062	6.85508e-05	0.000750765	4.10942e-05	4.17967e-05	2.32838e-05	4.81824e-05	0.000770939
β (1/bar)	0.0112598	9.8289e-06	0.0122017	8.30292e-07	8.53468e-07	1.44901e-06	5.01269e-07	0.0125432
SiO2	56.6243	63.5491	41.2046	50.739	49.7574	50.7338
TiO2	0.606797	0.732885	0.326032	0.0858554	0.291204		5.44101
Al2O3	13.9492	12.695	16.7421	2.79615	3.62991	31.5576	4.45512
Fe2O3	2.20166	2.21417	2.17379	2.25315	3.21632		55.0186
Cr2O3	0
FeO	7.19274	6.89885	7.84715	19.2382	10.8826		31.7726
MnO	0.170779	0.247365	0.000240305
MgO	3.33782	2.35271	5.53139	18.7618	13.944		3.31269
NiO	0
CoO	0
CaO	8.41827	7.40986	10.6637	6.06093	18.0989	14.1973
Na2O	2.10982	2.27804	1.73524	0.0649255	0.179702	3.45491
K2O	0.497073	0.707578	0.0283306			0.0563269
P2O5	0.0876453	0.12695	0.000123327
H2O	4.70385	0.787456	13.4247					97.6536
CO2	0.099996	5.24025e-05	0.322545					2.34639
MVPtot	5
R	0.0208158
T (C)	1064.25
P (bar)	80

## Sheet: P100
	system	liquid	solids(+water)	clinopyroxene	clinopyroxene	feldspar	spinel	fluid
mass (g)	100.047	71.4916	28.5551	4.67012	4.65063	13.6469	1.41895	4.16853
ρ (g/cm3)	0.345485	2.4807	0.109506	3.35678	3.30768	2.65969	4.7592	0.0165066
G (kJ)	-1640.11	-1146.47	-493.64	-68.7881	-71.0084	-233.201	-11.022	-109.62
H (kJ)	-1255.16	-899.589	-355.569	-54.5783	-57.1004	-190.426	-7.15688	-46.3069
S (J/K)	287.812	184.582	103.23	10.6241	10.3984	31.9811	2.8898	47.3367
Cp (J/K)	137.828	98.4059	39.4223	5.4989	5.37615	16.6216	1.30741	10.6183
V (cm3)	289.583	28.8192	260.764	1.39125	1.40601	5.131	0.298149	252.538
α (1/K)	0.000685308	7.22088e-05	0.000753067	4.10485e-05	4.17691e-05	2.31608e-05	4.83443e-05	0.000776611
β (1/bar)	0.00875831	1.01598e-05	0.00972514	8.28852e-07	8.52632e-07	1.44267e-06	5.03578e-07	0.0100419
SiO2	56.6243	63.0114	40.6334	50.8109	49.7885	50.4901
TiO2	0.606797	0.718073	0.328203	0.086769	0.293051		5.34048
Al2O3	13.9492	12.9409	16.4738	2.83355	3.68487	31.7225	4.60326
Fe2O3	2.20166	2.2289	2.13344	2.23217	3.19219		55.0932
Cr2O3	0
FeO	7.19274	6.96888	7.7532	18.9355	10.6524		31.5488
MnO	0.170779	0.238889	0.000255367
MgO	3.33782	2.44518	5.57266	18.9979	14.0666		3.41418
NiO	0
CoO	0
CaO	8.41827	7.45394	10.8326	6.03896	18.1444	14.3902
Na2O	2.10982	2.29714	1.64085	0.0642133	0.178002	3.34413
K2O	0.497073	0.68519	0.0260937			0.0530439
P2O5	0.0876453	0.1226	0.000131057
H2O	4.70385	0.888864	14.2552					97.6022
CO2	0.099996	6.66723e-05	0.350183					2.39778
MVPtot	5
R	0.0208158
T (C)	1064.36
P (bar)	100

## Sheet: P120
	system	liquid	solids(+water)	clinopyroxene	clinopyroxene	feldspar	spinel	fluid
mass (g)	100.045	73.8377	26.2076	4.85458	3.8214	12.1455	1.30713	4.079
ρ (g/cm3)	0.411782	2.47794	0.122949	3.30526	3.35311	2.66158	4.75424	0.0198287
G (kJ)	-1639.59	-1184.4	-455.187	-74.2462	-56.4194	-207.539	-10.1829	-106.799
H (kJ)	-1254.44	-928.496	-325.94	-59.722	-44.783	-169.492	-6.61983	-45.3229
S (J/K)	287.938	191.314	96.6242	10.8582	8.69931	28.4436	2.6637	45.9594
Cp (J/K)	138.468	101.917	36.5513	5.61666	4.50587	14.7908	1.20556	10.4325
V (cm3)	242.957	29.798	213.159	1.46874	1.13966	4.56329	0.274939	205.712
α (1/K)	0.000672532	7.55394e-05	0.000755987	4.17441e-05	4.10069e-05	2.30447e-05	4.84896e-05	0.000782252
β (1/bar)	0.0070915	1.04598e-05	0.00808138	8.51883e-07	8.27546e-07	1.43667e-06	5.0568e-07	0.00837388
SiO2	56.6243	62.5153	40.0271	49.8136	50.8742	50.2604
TiO2	0.606797	0.705002	0.330113	0.294859	0.0876503		5.24819
Al2O3	13.9492	13.1707	16.1428	3.73732	2.86936	31.8779	4.74651
Fe2O3	2.20166	2.24129	2.09	3.17129	2.21392		55.1548
Cr2O3	0
FeO	7.19274	7.03131	7.64755	10.446	18.6628		31.3403
MnO	0.170779	0.231299	0.000269418
MgO	3.33782	2.53234	5.60717	14.1745	19.2111		3.51023
NiO	0
CoO	0
CaO	8.41827	7.49744	11.0126	18.1862	6.01749	14.572
Na2O	2.10982	2.30974	1.54657	0.176322	0.0635044	3.23954
K2O	0.497073	0.664976	0.0240203			0.0501388
P2O5	0.0876453	0.118705	0.000138268
H2O	4.70385	0.981861	15.1902					97.5499
CO2	0.099996	8.14551e-05	0.381496					2.45011
MVPtot	5
R	0.0208158
T (C)	1064.47
P (bar)	120

[truncated: 22 more sheets: P140, P160, P180, P200, P300, P400, P500, P600, P700, P800, P900, P1000, P1100, P1200, P1300, P1400, P1500, P1600, P1700, P1800 …]
